# Supplementary material
Source: publisher figshare collection journal article supplement (https://springernature.figshare.com/ndownloader/files/11786240)
Supplement: Supplementary file 1 [file 11786240]

## Sheet: Page Area Date - 03-07
Hazards reported in Le Journal de L'ile: March - May 2007
Date	(dd/mm)	Code	Page Area (cm²)								Top Page Number
			Cyclone	Les "Squelletes Mystérieux"	eboulement / chute de pierres	Vagues / Houle	Crues	Volcan (non-francais)	Piton de la Fournaise		Cyclone	Les "Squelletes Mystérieux"	eboulement / chute de pierres	Vagues	Crues	Volcan (non-francais)	Piton de la Fournaise		No. Page 1's
1 March 2007	2007-03-01	a*	24284					129			1					49			8
2 March 2007	2007-03-02	b**	13315								1
3 March 2007	2007-03-03	c	9114	605							1	1
4 March 2007	2007-03-04	d	2653	2026							8	1
5 March 2007	2007-03-05	e	2518								2
6 March 2007	2007-03-06	f	1637	623					120		5	8					8
7 March 2007	2007-03-07	g	3987	582					430		10	14					9
8 March 2007	2007-03-08	h	3008								10
9 March 2007	2007-03-09	i	532	105	2104						10	24	11
10 March 2007	2007-03-10	j	4184								9
11 March 2007	2007-03-11	k	3898					32			5					45
12 March 2007	2007-03-12	L	305					845			4
13 March 2007	2007-03-13	m	1598	433							17	13
14 March 2007	2007-03-14	n	643	51							8	1
15 March 2007	2007-03-15	o	229	578							6	19
16 March 2007	2007-03-16	p	1561								8
17 March 2007	2007-03-17	Q	684	245							6	60
18 March 2007	2007-03-18	R	1157								8
19 March 2007	2007-03-19	S	915								4
20 March 2007	2007-03-20	t	546								22
21 March 2007	2007-03-21	u	1201								7
22 March 2007	2007-03-22	v	752				764				21				19
23 March 2007	2007-03-23	w	73		1928						6		14
24 March 2007	2007-03-24	x	576					25	43		21					47	6
25 March 2007	2007-03-25	z		913								12
26 March 2007	2007-03-26	AA	930								14
27 March 2007	2007-03-27	AB	56					49	300		26					45	1
28 March 2007	2007-03-28	AC	372						91		11						6
29 March 2007	2007-03-29	AD	280						882		9						6
30 March 2007	2007-03-30	AE	261					59	63		9					45	9
31 March 2007	2007-03-31	AF	544						355		9						1
Codes refer to article entry in coding book where the title, page number and areaa of each article are recorded, as well as the type of hazard to which each article refers

## Sheet: Page Area Date - 04-07
Hazards reported in Le Journal de L'ile: March - May 2007
Date	(dd/mm)	Code	Page Area (cm²)									Top Page Number
			Cyclone	Les "Squelletes Mystérieux"	eboulement / chute de pierres	Vagues / Houle	Crues	Volcan (non-francais)	Piton de la Fournaise			Cyclone	Les "Squelletes Mystérieux"	eboulement / chute de pierres	Vagues	Crues	Volcan (non-francais)	Piton de la Fournaise		No. Page 1's	Mag/Page No.
1 April 2007	2007-04-01	AG	250						2597	91.2188		5						1		13	2597							0	0
2 April 2007	2007-04-02	AH	372						172	31.6176		5						8			21.5					200		2000	0
3 April 2007	2007-04-03	AI	935						5098	84.5019		5						1			5098					200		2000	2000
4 April 2007	2007-04-04	AJ	469						7483	94.1021		5						1			7483					200		2000	2000
5 April 2007	2007-04-05	AK	527						7572	93.493		5						1			7572		2007-04-05	3	75	#REF!		#REF!	2000
6 April 2007	2007-04-06		0.001						5366	100								1			5366		2007-04-06	4	1000	537.5		5375	1125
7 April 2007	2007-04-07	AL	266						5953	95.7228		24						1			5953		2007-04-07	5	700	850		8500	5375
8 April 2007	2007-04-08	AM	425						6664	94.0048		48						1			6664		2007-04-08	6	300	500		5000	8500
9 April 2007	2007-04-09	AN	919						4582	83.2939		6						1			4582		2007-04-09	7	100	200		2000	5000
10 April 2007	2007-04-10	AO	255						4200	94.2761		24						1			4200		2007-04-10	8	55	77.5		775	2000
11 April 2007	2007-04-11		0.001						4179	100								1			4179		2007-04-11	9	30	42.5		425	775
12 April 2007	2007-04-12		0.001					42	2483	98.3366							45	3			827.667		2007-04-12	10	55	42.5		425	425
13 April 2007	2007-04-13		0.001						2178	100								1			2178		2007-04-13	11	55	55		550	425
14 April 2007	2007-04-14		0.001						1150	99.9999								--					2007-04-14	12	55	55		550	550
15 April 2007	2007-04-15		0.001						490	99.9998								5			98		2007-04-15	13	20	37.5		375	550
16 April 2007	2007-04-16	AP	584						2108	78.3061		3						6			351.333		2007-04-16	14	15	17.5		175	375
17 April 2007	2007-04-17	AQ	157				839		575	36.6009		7				21		4			143.75		2007-04-17	15	15	15		150	175
18 April 2007	2007-04-18	AR	37						1574	97.7033		21						3			524.667		2007-04-18	16	15	15		150	150
19 April 2007	2007-04-19		0.001					128	114	47.1072							71	10			11.4		2007-04-19	17	15	15		150	150
20 April 2007	2007-04-20		0.001						336	99.9997								4			84		2007-04-20	18	15	15		150	150
21 April 2007	2007-04-21	AS	0.001		134		941		188	14.8852				9		23		8			23.5								150
22 April 2007	2007-04-22	AT	73						2441	97.0963		11						1			2441
23 April 2007	2007-04-23		0.001						90	99.9989								19			4.73684
24 April 2007	2007-04-24		0.001						207	99.9995								4			51.75
25 April 2007	2007-04-25		0.001						1928	99.9999								35			55.0857
26 April 2007	2007-04-26	AU	40						916	95.8159		24						15			61.0667
27 April 2007	2007-04-27	AV	180						2746	93.8483		8						1			2746
28 April 2007	2007-04-28		0.001						445	99.9998								9			49.4444
29 April 2007	2007-04-29		0.001						1387	99.9999								4			346.75
30 April 2007	2007-04-30	AW	0.001		562				97	14.7192				10				7			13.8571
Codes refer to article entry in coding book where the title, page number and areaa of each article are recorded, as well as the type of hazard to which each article refers

## Sheet: Page Area Date - 05-07
Hazards reported in Le Journal de L'ile: March - May 2007
Date	(dd/mm)	Code	Page Area (cm²)								Top Page Number
			Cyclone	The "mysterious skeletons"	Land slides / rock falls	Waves / Swell	Flash floods	Volcano (non-French)	Piton de la Fournaise		Cyclone	The "mysterious skeletons"	Land slides / rock falls	Waves	Flash floods	Volcano (non-French)	Piton de la Fournaise		No. Page 1's
1 May 2007	2007-05-01		0.001																13
2 May 2007	2007-05-02		0.001						1041								1
3 May 2007	2007-05-03	AX	471		666				845		10		1				1
4 May 2007	2007-05-04		0.001						360								13
5 May 2007	2007-05-05		0.001						536								1
6 May 2007	2007-05-06		0.001						1579								1
7 May 2007	2007-05-07		0.001
8 May 2007	2007-05-08	AZ	0.001		4074				2165				1				3
9 May 2007	2007-05-09	BA	0.001		938				140				6				7
10 May 2007	2007-05-10	BB	0.001		2326								1
11 May 2007	2007-05-11	BA-2	50						128		19						8
12 May 2007	2007-05-12	BB-2	616						729		23						5
13 May 2007	2007-05-13	BC	44						358		5						1
14 May 2007	2007-05-14	BD	0.001		698	9880			422				19	1			17
15 May 2007	2007-05-15	BE	0.001			8532								1
16 May 2007	2007-05-16	BF	0.001	1492		2287			302			1		8			3
17 May 2007	2007-05-17	BG	126			741			66		17			22			6
18 May 2007	2007-05-18	BH	0.001			298			74					8			6
19 May 2007	2007-05-19	BI	52			696					21			26
20 May 2007	2007-05-20	BJ	1979			1384			123		10			8			5
21 May 2007	2007-05-21	BK	0.001			863								16
22 May 2007	2007-05-22	BL	197			732					52			3
23 May 2007	2007-05-23		0.001
24 May 2007	2007-05-24	BM	75								57
25 May 2007	2007-05-25	BN	55								10
26 May 2007	2007-05-26	BO	95						1282		58						14
27 May 2007	2007-05-27	BP	0.001			274			179					1			6
28 May 2007	2007-05-28	BQ	0.001			1273								1
29 May 2007	2007-05-29	BR	0.001			67								4
30 May 2007	2007-05-30		0.001					78	461							40	3
31 May 2007	2007-05-31		0.001
Codes refer to article entry in coding book where the title, page number and areaa of each article are recorded, as well as the type of hazard to which each article refers

## Sheet: TOTALS
Hazards reported in Le Journal de L'ile: March - May 2007
Hazard	Paper Area	Percent (by Hazard total)	Percent (by analysis area)
Cyclone (+ Flash Floods)	93606	42.4382	2.21009		22.057	m²
Landslides + Rock Falls	13430	6.08877	0.317089		0.245078	m²/day
Waves	27027	12.2533	0.638122
Volcano	86507	39.2197	2.04248
Total	220570		5.20777
No papers	90
Typical Issue Length	52
Typical Page Size	905	cm²
Total Paper Area	4235400	cm²
	423.54	m²
	4.706
